# Supplementary material for: Facile preparation of nanoflake MnNi2O4–PbS nanoparticle composites on Ni foam as advanced electrode materials for supercapacitors
Source: Royal Society of Chemistry journal article supplement (doi:10.1039/c8nj02709a), 2018-01-01
Supplement: c8nj02709a1.pdf [file c8nj02709a1.pdf]

### Supporting Information

#### **Facile preparation of nanoflake MnNi<sub>2</sub>O<sub>4</sub>-PbS nanoparticle composite on Ni foam as advanced electrode materials for supercapacitors**

Tae-Young Park,<sup>a</sup> Chandu V. V. Muralee Gopi\*,<sup>a</sup> Jin-Woo Ahn,<sup>b</sup>

Hee-Je Kim\*<sup>a</sup>

<sup>a</sup> School of Electrical and Computer Engineering, Pusan National University, Busandaehak-ro 63 beon-gil, Geumjeong-gu, Busan, 46241, South Korea.

<sup>b</sup> Dept. of Mechatronics Engineering, Kyungshung University, Busan, South Korea.

#### **\*Corresponding Author**

E-mail: [heeje@pusan.ac.kr](mailto:heeje@pusan.ac.kr) (H-J Kim); [naga5673@gmail.com](mailto:naga5673@gmail.com) (C.V.V.M. Gopi)

Tel: +82 51 510 2364. Fax: +82 51 513 0212.

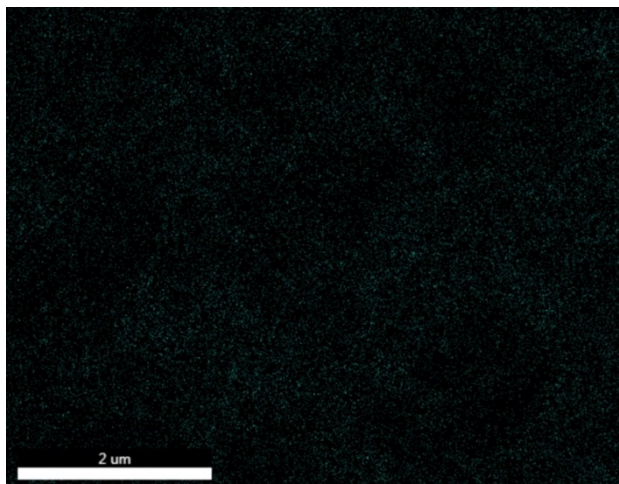

**Fig. S1** O element mapping
